# Supplementary material
Source: publisher figshare collection journal article supplement (https://gsapubs.figshare.com/ndownloader/files/22739774)
Supplement: Supplementary file 1 [file 22739774]

GSA Data Repository Item # 8408

Title of article Intracanyon flows of the Columbia River Basalt Group in  
the lower Columbia River Gorge and their relationship to the Troutdale Formation

Author(s) T. L. Tolan et al.

see GSA Bulletin v. 95, p. 463 - 477

Contents 2 pages

Tables 4 and 5  
\_\_\_\_\_  
\_\_\_\_\_  
\_\_\_\_\_  
\_\_\_\_\_  
\_\_\_\_\_  
\_\_\_\_\_  
\_\_\_\_\_  
\_\_\_\_\_  
\_\_\_\_\_

TABLE 4. Bulk clast composition (in %) of conglomerates from the Troutdale Formation as determined by pebble counts.

| Sample Number            | 1    | 2    | 3    | 4    | 5    | 6    | 7    | 8    | 9    |
|--------------------------|------|------|------|------|------|------|------|------|------|
| <u>Constituents</u>      |      |      |      |      |      |      |      |      |      |
| Columbia River basalt    | 55.8 | 76.4 | 67.7 | 14.8 | 64.8 | 75.7 | 31.8 | 30.9 | 9.5  |
| Basalt                   | 14.1 | 10.6 | 8.0  | 6.0  | 12.0 | 8.1  | 68.2 | 65.5 | 88.6 |
| Andesite                 | 6.1  | 3.3  | 9.0  | 9.3  | 6.8  | 2.0  | 0.0  | 0.0  | 0.0  |
| Dacite                   | 0.0  | 0.0  | 0.0  | 65.4 | 0.0  | 0.0  | 0.0  | 0.0  | 0.0  |
| Rhyolite                 | 1.8  | 0.8  | 0.6  | 0.0  | 1.8  | 0.7  | 0.0  | 0.0  | 0.0  |
| Granitic                 | 0.7  | 0.0  | 1.6  | 0.0  | 1.3  | 0.0  | 0.0  | 0.0  | 0.0  |
| Quartzite                | 9.2  | 5.6  | 7.7  | 3.9  | 7.6  | 8.8  | 0.0  | 0.0  | 0.0  |
| Cryptocrystalline quartz | 8.0  | 3.3  | 5.0  | 0.6  | 5.7  | 4.7  | 0.0  | 3.6  | 1.9  |
| Other                    | 4.3  | 0.0  | 0.3  | 0.0  | 0.0  | 0.0  | 0.0  | 0.0  | 0.0  |

| Sample | No. clasts counted | Member               | Location                                                                                                                                                                                 |
|--------|--------------------|----------------------|------------------------------------------------------------------------------------------------------------------------------------------------------------------------------------------|
| 1      | 163                | lower                | Collected at the 61-m elevation in unnamed stream valley south of Bridal Veil, Oregon (SW $\frac{1}{4}$ NE $\frac{1}{4}$ sec. 22, T1N, R5E)                                              |
| 2      | 123                | lower                | Collected at the 152-m elevation in unnamed stream valley south of Bridal Veil, Oregon (SW $\frac{1}{4}$ NE $\frac{1}{4}$ sec. 22, T1N, R5E)                                             |
| 3      | 313                | lower                | Collected at the 240-m elevation on Palmer Mill Road.                                                                                                                                    |
| 4      | 182                | lower (lahar)        | Collected at the 137-m elevation in unnamed stream valley south of Bridal Veil, Oregon (SW $\frac{1}{4}$ NE $\frac{1}{4}$ sec. 22, T1N, R5E).                                            |
| 5      | 159                | upper (transitional) | Collected at the 195-m elevation on Highway 14 west of Cape Horn, Washington (NW $\frac{1}{4}$ SW $\frac{1}{4}$ sec. 17, T1N, R5E)                                                       |
| 6      | 148                | upper (transitional) | Collected at the 213-m elevation on the east side of Crown Point, Oregon, along the Old Scenic Highway (NE $\frac{1}{4}$ SW $\frac{1}{4}$ sec. 30, T1N, R5E)                             |
| 7      | 66                 | upper                | Collected at the 213-m elevation on the west side of Crown Point, Oregon, along the Old Scenic Highway (NW $\frac{1}{4}$ SW $\frac{1}{4}$ sec. 30, T1N, R5E). Underlies Boring Lava flow |
| 8      | 55                 | upper                | Collected at the 213-m elevation on the west side of Crown Point, Oregon along the Old Scenic Highway (NW $\frac{1}{4}$ SW $\frac{1}{4}$ sec. 30, T1N, R5E). Foreset-bedded conglomerate |
| 9      | 105                | upper                | Collected at the 329-m elevation on Palmer Mill Road                                                                                                                                     |

**TABLE 5.** Bulk mineral composition (in %) of sandstones from the Troutdale Formation as determined by petrographic point counts of thin sections\*.

| Sample Number      | 1    | 2    | 3    | 4    | 5    | 6    | 7    | 8    | 9** | 10** | 11** |
|--------------------|------|------|------|------|------|------|------|------|-----|------|------|
| <u>Constituent</u> |      |      |      |      |      |      |      |      |     |      |      |
| Quartz             | 12.2 | 16.4 | 15.6 | 0.6  | 0.4  | 0.0  | 2.8  | 6.0  | 13  | 29   | 29   |
| Plagioclase        | 32.8 | 30.4 | 26.2 | 0.8  | 0.6  | 0.0  | 16.8 | 5.0  | 20  | 18   | 17   |
| K - feldspar       | 22.6 | 20.2 | 12.0 | 0.0  | 0.0  | 0.0  | 2.0  | 5.4  | 7   | 10   | 13   |
| Lithic fragments   | 16.6 | 14.8 | 23.0 | 97.2 | 96.4 | 99.0 | 66.4 | 71.6 | 56  | 35   | 32   |
| Opaque minerals    | 1.0  | 2.0  | 4.2  | 0.6  | 0.0  | 0.0  | 2.0  | 1.8  | 1   | 4    | 5    |
| Mafic minerals     | 10.2 | 12.4 | 16.2 | 0.4  | 2.4  | 0.8  | 8.4  | 8.6  | 4   | 5    | 4    |
| Mica               | 4.6  | 3.8  | 2.8  | 0.4  | 0.2  | 0.2  | 1.6  | 1.6  | -   | -    | -    |

\* 500 grains counted per sample.

\*\* Modern-day Columbia River bottom sediment provide for comparison. From Whetten and others (1969). Location of samples; 9 - below Bonneville Dam; 10 - from Bonneville reservoir; 11 - from The Dalles reservoir. Bulk mineral compositions for these samples is based on 250 grains counted per sample.

| <u>Sample Number</u> | <u>Member</u>     | <u>Location</u>                                                                                                                                              |
|----------------------|-------------------|--------------------------------------------------------------------------------------------------------------------------------------------------------------|
| 1                    | lower             | Collected at the 61-m elevation in the unnamed stream valley south of the town of Bridal Veil, Oregon (SW $\frac{1}{4}$ NE $\frac{1}{4}$ sec. 22, T1N, R5E). |
| 2                    | lower             | Collected at the 240-m elevation on Palmer Mill Road                                                                                                         |
| 3                    | lower             | Collected at the 95-m elevation below Highway 14 west of Cape Horn, Washington (NW $\frac{1}{4}$ SW $\frac{1}{4}$ sec. 17, T1N, R5E).                        |
| 4                    | upper<br>(vitric) | Collected at the 329-m elevation on Palmer Mill Road                                                                                                         |
| 5                    | upper<br>(vitric) | Collected at the 366-m elevation on Multnomah Creek Trail (Trail No. 441; SE $\frac{1}{4}$ NE $\frac{1}{4}$ sec. 18, T1N, R6E).                              |
| 6                    | upper<br>(vitric) | Collected at the 183-m elevation on Chanticleer Point Road (NW $\frac{1}{4}$ SW $\frac{1}{4}$ sec. 25, T1N, R4E).                                            |
| 7                    | upper<br>(lithic) | Collected at the 329-m elevation on Palmer Mill Road                                                                                                         |
| 8                    | upper<br>(lithic) | Collected at the 18-m elevation at the Stark Street Bridge, lower Sandy River, Oregon (SW $\frac{1}{4}$ NE $\frac{1}{4}$ sec. 6, T1S, R4E).                  |
